RESEARCH ARTICLE

# Imbalanced Hemolymph Lipid Levels Affect Feeding Motivation in the Two-Spotted Cricket, *Gryllus bimaculatus*

Takahiro Konuma<sup>1</sup>, Yusuke Tsukamoto<sup>2</sup>, Hiromichi Nagasawa<sup>1</sup>, Shinji Nagata<sup>1,2\*</sup>

**1** Department of Applied Biological Chemistry, Graduate School of Agricultural and Life Sciences, the University of Tokyo, Tokyo, Japan, **2** Department of Integrated Biosciences, Graduate School of Frontier Sciences, the University of Tokyo, Chiba, Japan

\* [shinjin@edu.k.u-tokyo.ac.jp](mailto:shinjin@edu.k.u-tokyo.ac.jp)

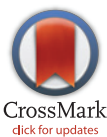

OPEN ACCESS

**Citation:** Konuma T, Tsukamoto Y, Nagasawa H, Nagata S (2016) Imbalanced Hemolymph Lipid Levels Affect Feeding Motivation in the Two-Spotted Cricket, *Gryllus bimaculatus*. PLoS ONE 11(5): e0154841. doi:10.1371/journal.pone.0154841

**Editor:** Christian Wegener, University of Würzburg, GERMANY

**Received:** May 14, 2013

**Accepted:** April 20, 2016

**Published:** May 4, 2016

**Copyright:** © 2016 Konuma et al. This is an open access article distributed under the terms of the [Creative Commons Attribution License](https://creativecommons.org/licenses/by/4.0/), which permits unrestricted use, distribution, and reproduction in any medium, provided the original author and source are credited.

**Funding:** This work was partly supported by a Grant-in-Aid for Scientific Research #24580157 from the Ministry of Education, Science, Sports, and Culture of Japan, and the NAITO Foundation. The funders had no role in study design, data collection and analysis, decision to publish, or preparation of the manuscript.

**Competing Interests:** The authors have declared that no competing interests exist.

## Abstract

Insect feeding behavior is regulated by many intrinsic factors, including hemolymph nutrient levels. Adipokinetic hormone (AKH) is a peptide factor that modulates hemolymph nutrient levels and regulates the nutritional state of insects by triggering the transfer of lipids into the hemolymph. We recently demonstrated that RNA interference (RNAi)-mediated knockdown of the AKH receptor (AKHR) reduces hemolymph lipid levels, causing an increase in the feeding frequency of the two-spotted cricket, *Gryllus bimaculatus*. This result indicated that reduced hemolymph lipid levels might motivate crickets to feed. In the present study, to elucidate whether hemolymph lipid levels contribute to insect feeding behavior, we attempted to manipulate hemolymph lipid levels via the lipophorin (Lp)-mediated lipid transferring system in *G. bimaculatus*. Of the constituent proteins in Lp, we focused on apolipophorin-III (GrybiApoLp-III) because of its possible role in facilitating lipid mobilization. First, we used RNAi to reduce the expression of GrybiApoLp-III. RNAi-mediated knockdown of *GrybiApoLp-III* had little effect on basal hemolymph lipid levels and the amount of food intake. In addition, hemolymph lipid levels remained static even after injecting AKH into *GrybiApoLp-III*<sup>RNAi</sup> crickets. These observations indicated that ApoLp-III does not maintain basal hemolymph lipid levels in crickets fed *ad libitum*, but is necessary for mobilizing lipid transfer into the hemolymph following AKH stimulation. Second, Lp (containing lipids) was injected into the hemolymph to induce a temporary increase in hemolymph lipid levels. Consequently, the initiation of feeding was delayed in a dose-dependent manner, indicating that increased hemolymph lipid levels reduced the motivation to feed. Taken together, these data validate the importance of basal hemolymph lipid levels in the control of energy homeostasis and for regulating feeding behavior in crickets.

## Introduction

The feeding behavior of insects has been extensively investigated, particularly in the migratory locust, *Locusta migratoria* [1–3]. The feeding behaviors of *L. migratoria* occur at regular intervals [2], and they are assumed to result from a repertoire of physiologically important causal factors [3, 4]. For example, fullness of the hindgut [5], dietary nutrients [6], nutrient content in the hemolymph [7], and light stimulation [8] have been demonstrated to display feeding rhythmicity in this species. Although the physiological relationship between feeding behavior and these causal factors has been investigated, limited information is available at the molecular level.

Our research group has focused on how the nutrient content in the hemolymph affects feeding behavior in crickets at the molecular level. Hemolymph nutrient levels are influenced by the equilibration between the utilization of stored nutrients and ingested nutrients/metabolites [9]. In insects, the fat body functionally corresponds to adipocytes and the liver of vertebrates [10, 11]. The fat body stores metabolic fuels, such as glycogen and triacylglycerol, and synthesizes the hemolymph sugar, trehalose [12]. Consequently, hemolymph nutrient and metabolite levels might be indicators for maintaining nutrient levels, possibly reflecting the demand for nutrients.

Among several essential nutrients, the levels of hemolymph sugars and lipids are modulated by adipokinetic hormone (AKH), which is thought to be functionally related to mammalian glucagon [13]. AKH is a peptide hormone, originally identified as a stimulating factor for lipid mobilization and locomotor activity in locusts [14, 15]. AKH is a highly conserved peptide hormone in insects, and AKHs have been identified from over 40 insect species [14].

Water-insoluble nutrients in hemolymph, including lipids, require the presence of carrier or scavenger proteins to maintain optimal levels and to enable transport between organs. The Lipophorin (Lp) family of plasma lipoproteins participates in lipid transport during the mobilization process of lipid entry into hemolymph by acting as reusable shuttle particles [16, 17]. High-density Lp (HDLp) is the main lipophorin in the hemolymph of resting insects. HDLp is generally composed of two apolipoproteins: ApoLp-I (250,000 Da) and ApoLp-II (80,000 Da) [18]. Another predominant apolipoprotein of Lp, ApoLp-III (18,000 Da) is found in the hemolymph as its free form and as a complex associated with HDLp [19, 20]. This complex form, called low-density Lp (LDLp), is formed when HDLp is required for loading additional lipids, such as diacylglycerol (DAG), which is a hydrolyzed lipid of triacylglycerol (TAG) located in the AKH-stimulated fat body [19, 20]. It is implied that AKH is the key peptide hormone necessary to maintain lipid homeostasis in insects, including the maintenance of hemolymph lipid levels and mobilization of lipids from the fat body into hemolymph.

In addition to its energy-mobilizing activity, AKH influences the regulation of feeding-related behavior, including starvation-driven hyperlocomotion (e.g., food-searching behavior) [21, 22]. We previously showed that nutrients, particularly lipids controlled by AKH signaling, may affect the feeding behavior of the two-spotted cricket *Gryllus bimaculatus* [23]. Knock-down of the AKH receptor in *G. bimaculatus* (*GrybiAKHR*) by RNA interference (RNAi) reduced the lipid and carbohydrate levels in the hemolymph, which significantly increased feeding frequency [23]; however, the mechanism of how reductions in lipids and carbohydrates lowered hemolymph nutrient levels to affect feeding behavior at the molecular level has yet to be elucidated.

Because imbalanced lipid levels in *GrybiAKHR*<sup>RNAi</sup> crickets cause changes in feeding frequency [23], we focused on hemolymph lipid levels as a possible causal factor of feeding behavior in crickets. To determine whether hemolymph lipids contribute to insect feeding behavior, we sought to modulate hemolymph lipid levels by two experimental parameters: (i)

transcriptional manipulation through RNAi targeting *ApoLp-III* in *G. bimaculatus* (*GrybiApoLp-III*), and (ii) injection of *G. bimaculatus* Lp (*GrybiLp*) into the hemolymph. Finally, using data from these experiments, we discuss how hemolymph lipid mobilization facilitated by Lp potentially affects hemolymph lipid levels, and whether changes in hemolymph lipid levels affect the feeding behavior of two-spotted crickets.

## Materials and Methods

### Insects

Fifth instar larvae of the two-spotted cricket *G. bimaculatus* were purchased from Tsukiyono farm Co., Ltd. (Gunma, Japan). Crickets were reared in plastic containers (55 × 39 × 31 cm) at 27 ± 1°C, 70 ± 5% relative humidity, and under long-day lighting conditions (16L: 8D). Crickets were fed *ad libitum* on a standard diet for rabbits (ORC4; Oriental Yeast Co., Ltd., Tokyo, Japan) with unlimited access to water. Although most of the crickets molted simultaneously, we selected crickets with synchronous growth from the fifth instar to adult emergence. In all experimental procedures, excluding the feeding assay, we used adult male crickets on the day they emerged. These crickets were kept isolated in plastic containers (17 × 10 × 12 cm) until they were used in experiments.

### Identification of *GrybiApoLp-III*

Hemolymph collected from crickets was subjected to SDS-PAGE. Hemolymph was collected by pipetting using a micropipette adjusted to 5 µL. The collected hemolymph was immediately transferred into ice-cold loading buffer to prevent clotting before SDS-PAGE. The gel bands stained with Coomassie Brilliant Blue (CBB) were excised. Individual gel pieces were submerged in methanol for 10 min to dehydrate. The resulting gel pieces were dried and then trypsinized at 37°C for 14 h by swelling with the 0.1% sequence grade trypsin (Roche) in 0.1 M ammonium acetate. The resulting peptide fragments were extracted from the gel piece by two submersions in 60% acetonitrile containing 0.1% TFA. The collected peptide fragments were subjected to RP-HPLC with a PEGASIL 300 ODS column (4.6 i.d. × 250 mm) using a linear gradient program (10–60% acetonitrile in 0.05% TFA over 40 minutes at a flow rate of 1 mL/min). Peaks were detected at an absorbance of 225 nm. Four significant peaks were recovered and were subjected to amino acid sequencing using a Procise cLC protein sequencer (Applied Biosystems, Foster City, CA).

### Native-PAGE analysis of *GrybiApoLp-III*

To analyze the hemolymph to determine the free *GrybiApoLp-III* level, the collected hemolymph (2.2 µL) was subjected to native-PAGE stained with CBB. Hemolymph was collected by pipetting and was then transferred into an ice-cold tube using a micropipette as described above. During native-PAGE analysis, a band corresponding to free *GrybiApoLp-III* was confirmed by N-terminal amino acid sequence analysis on a Procise cLC protein sequencer (data not shown). The quantity of free *GrybiApoLp-III* was evaluated by comparing its density with that of the CBB-stained bands.

### cDNA cloning of putative *GrybiApoLp-III*

Crickets were anesthetized at 4°C and the fat body was dissected out. The resulting total RNAs from the tissues were extracted using TRIZOL reagent (Invitrogen, Carlsbad, CA) according to the manufacturer's protocol. Resulting total RNAs were treated with RQ DNase I (Promega, Madison, WI). The extracted total RNAs (500 ng each) were reverse-transcribed using

Superscript III RNaseH<sup>-</sup> reverse transcriptase (Invitrogen) and an oligo (dT) primer [5'-AAGGAGTGGTATCCAGTGTGCTGG(T)<sub>30</sub>VN-3']. The PCR (polymerase chain reaction) targeting a *GrybiApoLp-III* partial cDNA fragment was performed using a set of specific primers that were designed based on the nucleotide sequences of *Acheta domesticus ApoLp-III* [20]; Achdo ApoLp-III-F, 5'-ACCATCCAGAACGCGCTGCCT-3' and AchdoApoLp-III-R, 5'-GCACAGACTGCTGCACCTGGTT-3'. The PCR was performed using a GeneAmp PCR System 9700 (Applied Biosystems, Foster City, CA) with TaKaRa Ex Taq polymerase (TaKaRa Bio, Shiga, Japan) at the following PCR conditions: an initial denaturation step at 94°C for 3 min, followed by 35 cycles of amplification (94°C for 30 sec, 50°C for 30 sec, 72°C for 1 min for the first PCR and nested PCR). All PCR runs were performed under the same conditions as those described above except for changes to the annealing temperature and extension time. 3'-RACE (rapid amplification of cDNA end) was performed using a FirstChoice RLM-RACE Kit (Ambion Inc., Austin, TX). For 3'-RACE of *GrybiApoLp-III*, the 3'-RACE outer primer and ApoLp-III-3R1 (5'-ACCATCCAGAACGCGCTGCCTT-3') were used for the first round of PCR with 35 amplification cycles (94°C for 30 sec, 60°C, for 30 sec, 72°C for 2 min). The 3'-RACE inner primer and ApoLp-III-3R2 (5'-AGGAAGTGCACGCA-3') were used for nested PCR with 35 amplification cycles (94°C for 30 sec, 50°C for 30 sec, 72°C for 2 min). PCR products were electrophoresed and extracted using a QIAquick Gel Extraction Kit (Qiagen, CA), which were then subcloned into a pGEM-T vector (Promega) using a cDNA Ligation Kit Ver. 2.1 (TaKaRa Bio) and transformed into XL1-Blue *Escherichia coli*. The inserted cDNAs were sequenced using a BigDye Terminator v3.1 Cycle Sequencing Kit (Applied Biosystems) on an ABI PRISM 310 Genetic Analyzer (Applied Biosystems). The accession number of Genbank for *GrybiApoLp-III* is AHF53422.1.

## Sequence alignment and phylogenetic analysis

The deduced amino acid sequence of *GrybiApoLp-III* was aligned with those of known and annotated ApoLp-IIIs, which were obtained from GenBank using BLAST (Basic Local Alignment Search Tool) searches (blastn and tblastn programs). Amino acid sequences of ApoLp-IIIs were aligned using ClustalW. A phylogenetic tree was generated by the Neighbor-joining method. ApoLp-III sequences used in the phylogenetic analysis included (GenBank accession number following species abbreviation in parenthesis): *Gryllus bimaculatus* (*Grybi*), KC684976; *Spodoptera exigua* (*Spoex*), AEW24424; *Nilaparvata lugens* (*Nillu*), ADE34171; *Trichoplusia ni* (*Trini*), ABV68867; *Hyphantria cunea* (*Hypcu*), AAQ24031; *Plutella xylostella* (*Pluxy*), ADK78218; *Manduca sexta* (*Manse*), AAA29300; *Galleria mellonella* (*Galme*), CAA07363; *Bombyx mori* (*Bommo*), NP\_001037078; *Bombyx mandarina* (*Bomma*), AAB02851; *Aedes aegypti* (*Aedae*), XP\_001659524; *Culex quinquefasciatus* (*Culqu*), EDS29975; *Anopheles gambiae* (*Anoga*), ADM86753; *Anopheles sinensis* (*Anosi*), ADN52300; *Acheta domesticus* (*Achdo*), AAA64737; *Tribolium castaneum* (*Trica*), EFA05722; *Locusta migratoria* (*Locmi*), AAA29282; and *Homo sapiens* (*Homsa*) apolipoprotein-AI (an outgroup), CAA30377.

## Expression analysis using RT-PCR (reverse-transcription-polymerase chain reaction)

Total RNA extraction and subsequent cDNA synthesis was performed as described above. Tissues (fat body, foregut, midgut, hindgut, Malpighian tubule, trachea, muscle, ovary, testis, and nervous system) were carefully dissected from anesthetized crickets. Hemocytes were collected after separation from hemolymph by centrifugation for 3 min at 2,000 × g at 4°C. Partial cDNA fragments of *GrybiApoLp-III* and elongation factor-1 $\alpha$  (*GrybiEF*) (GenBank accession number: AB583234.1) were amplified using the following primers: ApoLp-III-Fw (5'-AGG

AGGAAGTGCACGCAA-3'); ApoLp-III-Rv (5'-GCAGTCTTGAGGGACTCTGCGA-3'); EF-Fw (5'-ATGCCTGTATCTTGACTGCTCA-3'); and EF-Rv (5'-ATGGTTTGCTTCCAGTTTCAGT-3'). PCR conditions were as follows: 94°C for 30 sec, 50°C for 30 sec, 72°C for 1 min for 31 cycles for *GrybiApoLp-III* and 30 cycles for *GrybiEF*.

## RNA interference

To prepare dsRNA, template cDNA was generated by PCR using primers targeting fragments of *GrybiApoLp-III* and *EGFP* (enhanced green fluorescent protein) cDNA with an additional T7 promoter sequence (underlined) at the 5'-terminal end: T7-ApoLp-III-Fw (5'-GCTTCTAA TACGACTCACTATAGCAGACCTTTGCCAACAAACGT-3'); T7-ApoLp-III-Rv (5'-GCTTCTAATACGACTCACTATAGACAGACTGCTGCACCTCCTT-3'); T7-EGFP-Fw (5'-GCTTCTAATACGACTCACTATAGAGCTGACCCTGAAGTTCATCTG-3'); and T7-EGFP-Rv (5'-GCTTCTAATACGACTCACTATAGCTTGTACAGCTCGTCCATGC-3'). RNAs were synthesized with T7 RNA polymerase using 500 ng of the PCR products as template DNAs. The synthesized RNAs were purified by phenol/chloroform extraction and ethanol precipitation, and then dissolved in diethylpyrocarbonate (DEPC)-treated water to a final concentration of 3 µg/µL. Complementary RNAs were denatured for 5 min at 100°C and cooled to room temperature for annealing overnight. For transcriptional knockdown, the prepared dsRNA solutions (*GrybiAKHR*-dsRNA and *EGFP*-dsRNA) (3 µg and 1 µL, respectively) were administered orally [23] on the day of adult emergence for transcriptional knockdown. Non-target effects of *EGFP*-dsRNA treatment were confirmed by using different dsRNA encoding DsRed II. The dsRNA was prepared using following primers: T7-DsRed2Fw (5'-GCTTCTAATACGACTCACTATAGAGAACGTCATCACCGAGTTCAT-3') and T7-DsRed2rev (5'-GCTTCTAATACGACTCACTATAGCCGATGAACTTCACCTTGTAGA-3') with pDsRedII as template DNA. Efficiency of RNAi was evaluated by quantitative RT-PCR using a Thermal Cycler Dice Real Time System (TaKaRa Bio). The reaction was carried out using SYBR-premix Ex taq-II (TaKaRa Bio) with the specific primers 5'-TCGCAGAGTCCCTCAAGACT-3' and 5'-AGACTGCTGCACCTGGTTG-3'. To evaluate the reaction using the  $\Delta$ Ct method, we used primers specific to a house-keeping gene, Elongation Factor (5'-CCCTGCTGCTGTTGCTTT-3' and 5'-CCCATTTTGTCTGGAGTGC-3').

## Lipid and carbohydrate extraction from hemolymph and the fat body

Lipids were extracted using established protocols [23, 24]. In brief, cricket hemolymph (5 µL) was collected into a tube containing 10 mg sodium sulfate and 100 µL 75% methanol, which was then homogenized in 300 µL of chloroform/methanol (1:1 ratio), vortexed, and centrifuged (15,300 × g at 4°C for 10 min). The supernatant was transferred to a new tube and then vortexed and centrifuged (15,300 × g at 4°C for 10 min) following the addition of 150 µL chloroform and 250 µL 1 M NaCl in distilled water. The organic lipid-containing layer was dried under vacuum centrifugation. The resulting oily liquid was used for quantification of lipids.

## Lipid quantification

Extracted hemolymph lipids were measured using the sulfo-phospho-vanillin method [23, 25]. Extracted lipids in a 1:1 ratio of chloroform/methanol (1 µL) mixed with 50 µL of sulfuric acid were heated at 100°C for 10 min. After cooling, 500 µL of vanillin reagent (0.2% vanillin in 67% ortho-phosphoric acid) was added. The resulting samples were measured at 540 nm. Cholesterol (Sigma-Aldrich, Tokyo, Japan) was used as a standard lipid. The resulting amount of hemolymph lipids were quantified as that of DAG.

## Preparation and injection of GrybiAKH

GrybiAKH (pQVNFSTGWamide) was synthesized and purified as reported previously [23]. GrybiAKH was injected into the hemolymph through the abdominal cavity with the needle oriented towards the head. Five pmol of GrybiAKH in 3  $\mu$ L water, or 3  $\mu$ L Ringer's solution [140 mM NaCl, 4.7 mM KCl, 2.0 mM CaCl<sub>2</sub>, 2.0 mM MgCl<sub>2</sub>, 5 mM HEPES-NaOH (pH 7.1)] was injected into each cricket. To measure hemolymph lipids, 5  $\mu$ L of hemolymph was collected immediately prior to injection and again 90 min after injection.

## Food intake assay

On the day of adult emergence, virgin female and male crickets were treated with 3  $\mu$ g *GrybiApoLp-III*-dsRNA or *EGFP*-dsRNA and then were kept isolated in plastic containers (17  $\times$  10  $\times$  12 cm). The approximate amount of food intake was evaluated according to an index of food intake as defined previously [23] by counting the number of fecal pellets every 24 hours for ten days.

## Collection and injection of Lp from hemolymph

Hemolymph was collected directly into an ice-cold tube. Collected hemolymph (700  $\mu$ L) was centrifuged (1,000  $\times$  g for 10 min) to remove hemocytes. The supernatant was mixed with 1 mL phosphate buffered saline (PBS). Using this solution, GrybiLp was isolated by KBr gradient ultracentrifugation (40,000  $\times$  g for 16 h) (Optima<sup>TM</sup> L-70R Ultracentrifuge; Beckman Coulter, Brea, CA). Following ultracentrifugation, each fraction was weighed to calculate its density. Each fraction was desalted against PBS and concentrated to 50  $\mu$ L by passing through an Ultrafree-MC 10,000 NMWL Filter Unit (Amicon Millipore, Bedford, MA). The amount of lipid in each fraction was measured after lipid extraction as described above. These lipid fractions containing Lp were used in the experiments. One  $\mu$ L of the Lp-dissolved solution was injected into each cricket.

## Statistical analyses

Comparison of the two experimental groups was performed using the Mann-Whitney test (Fig 6D). Multiple comparisons were performed using Tukey's HSD test (Fig 4) and Dunnett's test (Fig 6C). *P*-values less than 0.05 were considered statistically significant. All experiments were repeated for confirmation of reproducibility. In all figures, the data from the representative and reproducible results among the trials of the same sized experiments are described.

## Results

### Identification of *Gryllus bimaculatus* ApoLp-III

Because ApoLp-III in *G. bimaculatus* (GrybiApoLp-III) has not yet been identified, we performed an SDS-PAGE analysis to identify that protein using *G. bimaculatus* hemolymph (Fig 1A). We observed a predominant band similar in size to ApoLp-III from the hemolymph of *Bombyx mori* [26] (Fig 1A). Sequencing of the protein's N-terminus and trypsinized peptides (Fig 1B) revealed a partial protein sequence that was highly homologous to ApoLp-III in the closely related cricket species, *Acheta domesticus* [27] (Fig 1C). To obtain the entire amino acid sequence of GrybiApoLp-III, we performed RT-PCR using specific primers designed to the identified amino acid sequences and to *A. domesticus* ApoLp-III. The RT-PCR analysis revealed a partial sequence encoding *GrybiApoLp-III* (386 bp) within the identified amino acid sequence. The remaining 3' end of *GrybiApoLp-III* was obtained using the 3'-RACE procedure

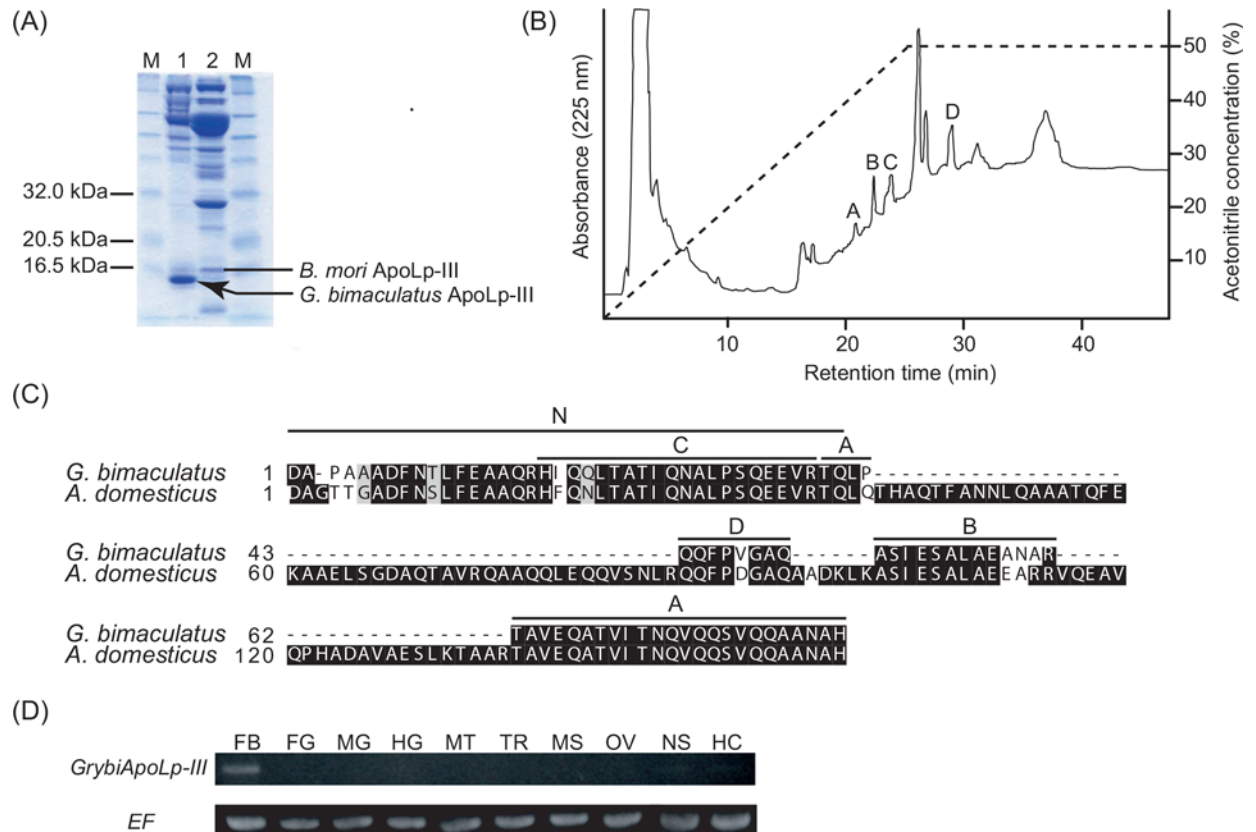

**Fig 1. Identification of GrybiApoLp-III.** (A) Analysis of hemolymph proteins from *G. bimaculatus* (lane 1) and *B. mori* (lane 2) separated by SDS-PAGE. *B. mori* ApoLp-III is indicated by a bar. The candidate for GrybiApoLp-III is indicated by an arrow. (B) The RP-HPLC profile of gel-digested proteins from the band corresponding to the GrybiApoLp-III candidate. Peaks A–D were subsequently subjected to amino acid digested proteins from the band corresponding to the GrybiApoLp-III candidate. Peaks A–D were subsequently subjected to amino acid sequence analyses. (C) Alignment of amino acid sequences of the resulting GrybiApoLp-III and *A. domesticus* ApoLp-III sequences. Bars above sequences indicate the results of amino acid sequence analyses. N-terminal sequence, from 1st residue (D) to 38th residue (L), and fragment sequences from peaks A–D in RP-HPLC indicate N and A–D, respectively. (D) Tissue distribution of *G. bimaculatus* ApoLp-III by RT-PCR. Elongation factor (EF) was used as an experimental control. FB, Fat body; FG, foregut; MG, midgut; HG, hindgut; MT, Malpighian tubules; TR, trachea; MS, muscle; OV, ovary; NS, nervous system; HC, hemocytes.

doi:10.1371/journal.pone.0154841.g001

(S1A Fig). Together with the amino acid sequence analyses, we determined the entire 148 amino acid sequence of the mature GrybiApoLp-III protein (S1B Fig).

The identified amino acid sequence of GrybiApoLp-III exhibited the highest similarity (97%) with that of *A. domesticus* ApoLp-III, clustering in the same phylogenetic clade as other insect ApoLp-III proteins (S1C Fig). The RT-PCR analysis, using total RNA extracted from the tissues of adult female and male crickets, confirmed that *GrybiApoLp-III* is predominantly expressed in the fat body, the site of apolipoprotein production in other insects [27] (Fig 1D).

## Role of GrybiApoLp-III in rapid lipid mobilization triggered by AKH and long-term starvation

As AKH is a peptide hormone facilitating the mobilization of lipids from the fat body to hemolymph, we investigated the contribution of GrybiApoLp-III to AKH-stimulated lipid mobilization. To confirm whether GrybiApoLp-III is involved in AKH-induced lipid mobilization from the fat body into hemolymph, we analyzed the proteins in the hemolymph collected before and after AKH injection by native-PAGE analysis (Fig 2A). Because the band corresponding to free

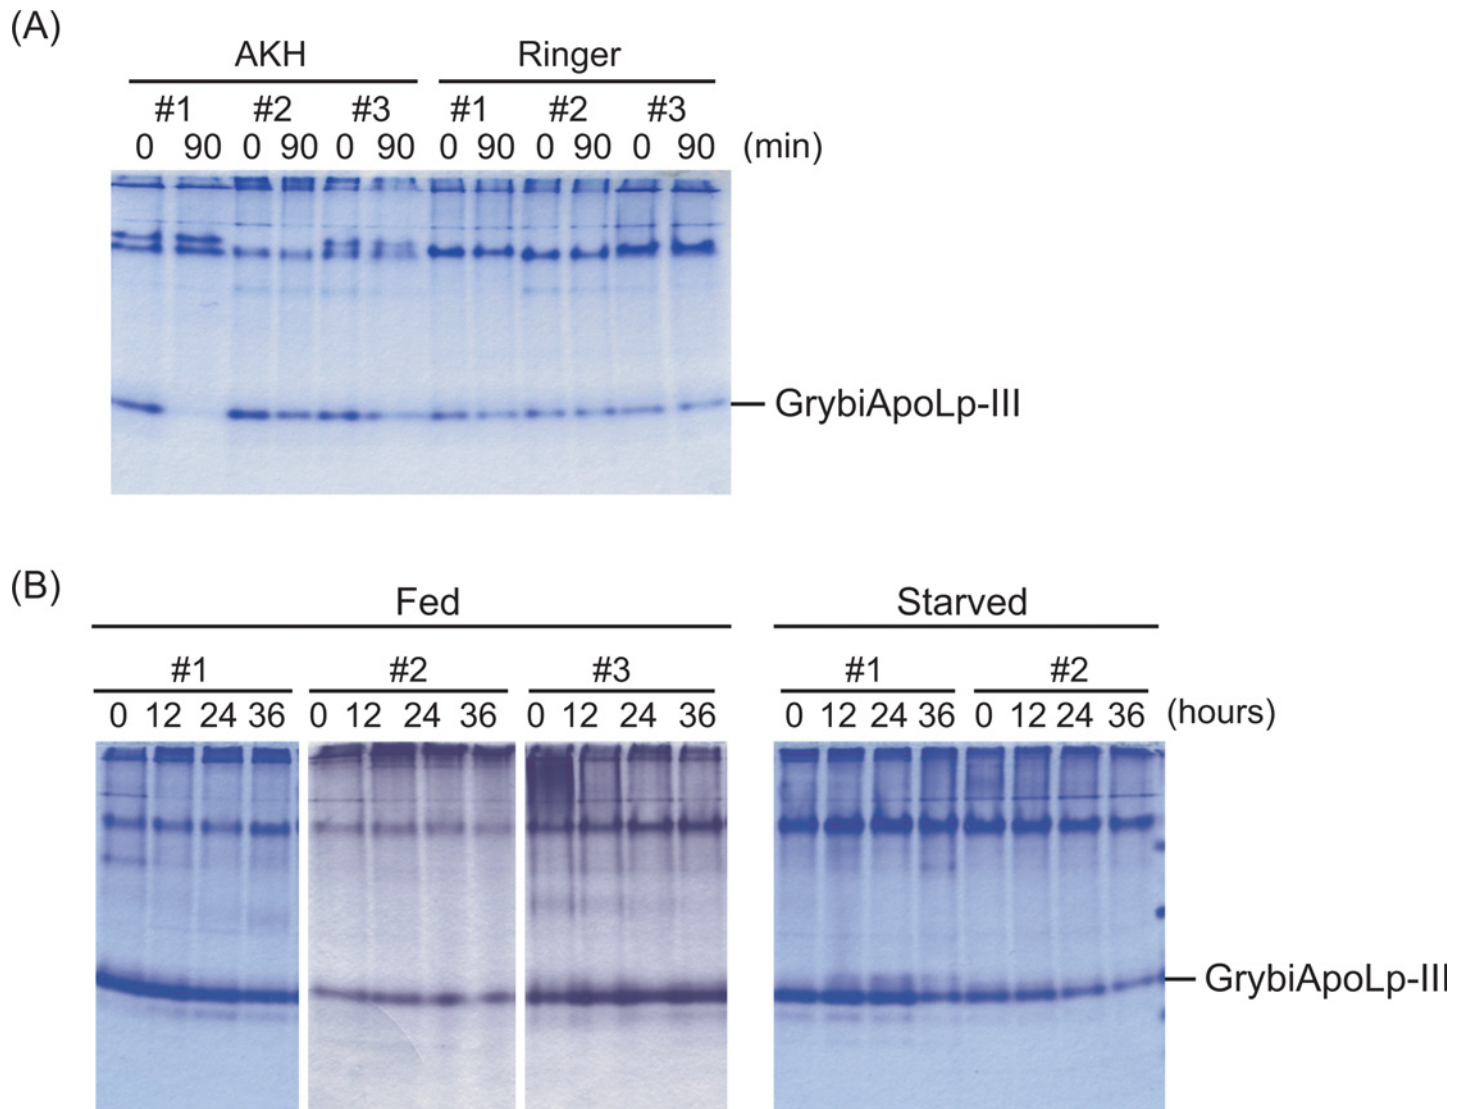

**Fig 2. Changes in the amount of free GrybiApoLp-III by AKH stimulation and starvation.** (A) Representative data from native PAGE analyses of proteins in *G. bimaculatus* hemolymph before and after AKH injection. Free GrybiApoLp-III is indicated by a bar. Figures are representative data from experiments using three individual crickets [the lane number (#1, #2, and #3) indicates the sample from an individual cricket]. Reproducibility of this experiment was confirmed by different experimental trials using more than 30 individuals. (B) Representative data from native PAGE analyses of proteins in hemolymph of starved *G. bimaculatus*. Free GrybiApoLp-III is indicated by a bar. Numbers represent individual crickets (#1, #2 and #3). Data on the left (samples from fed crickets) is composed of three single gels. The reproducibility of this experiment was also confirmed by different trials using totally more than 30 individual crickets from different populations.

doi:10.1371/journal.pone.0154841.g002

GrybiApoLp-III resolved as a separate band from the Lp complex (Fig 2), we were able to visually track the AKH-dependent change in the amount of free GrybiApoLp-III in the hemolymph. AKH injection decreased free GrybiApoLp-III in the hemolymph after 90 min when hemolymph carbohydrate and lipid levels had increased, whereas no change in free GrybiApoLp-III was observed after injecting only Ringer's solution (Fig 2A). This result suggests that formation of the LDLp complex from HDLp and apoLp-III is required for DAG mobilization, and that GrybiApoLp-III is involved in lipid transfer from the fat body to hemolymph following AKH stimulation in crickets.



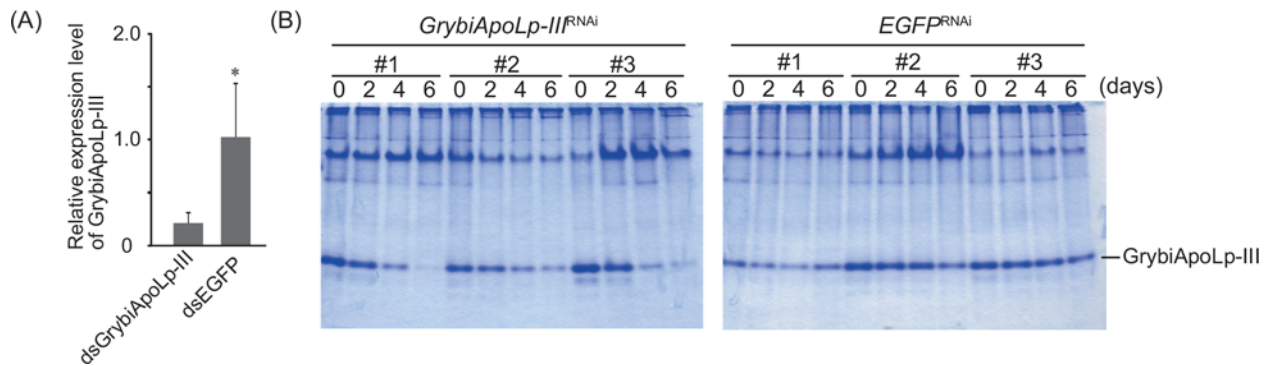

**Fig 3. Efficiency of knockdown by *G. bimaculatus* ApoLp-III-dsRNA treatment.** (A) Quantitative RT-PCR analysis of *GrybiApoLp-III* in *GrybiApoLp-III*-dsRNA-treated (*GrybiApoLp-III*<sup>RNAi</sup>) crickets. RNA was prepared from the fat body of crickets 2 days after dsRNA treatment. *EGFP*-dsRNA was used as an experimental control (*EGFP*<sup>RNAi</sup>). EF (elongation factor) was used as a reference of transcription. Mean + SD (n = 5), \*, *P* < 0.01, Student's *t* test. (B) Representative data of native-PAGE analyses of hemolymph collected from crickets after *GrybiApoLp-III*-dsRNA treatment (*GrybiApoLp-III*<sup>RNAi</sup>). Hemolymph was collected 0, 2, 4, and 6 days after dsRNA treatment, and was subjected to native-PAGE. *EGFP*-dsRNA was used as an experimental control (*EGFP*<sup>RNAi</sup>). *GrybiApoLp-III* is indicated by a bar. Numbers represent individual crickets. The reproducibility of this experiment was confirmed by different trials totally using more than 30 individuals from different populations. We also confirmed no off-target effects by dsRNA encoding *EGFP* using different control gene (*DsRed*) (*S2 Fig*).

doi:10.1371/journal.pone.0154841.g003

Next, we analyzed whether free *GrybiApoLp-III* in the hemolymph is also affected by starvation. Our native-PAGE analyses showed that starvation for longer than 24 h decreased free levels of *GrybiApoLp-III* in the hemolymph, whereas free *GrybiApoLp-III* in crickets fed *ad libitum* remained static (*Fig 2B*). This decline in free *GrybiApoLp-III* levels during long-term starvation indicated that free *GrybiApoLp-III* associates with HDLp to mobilize lipids into the hemolymph, similar to what is observed during AKH-stimulation.

### Confirmation of the effects of RNAi targeting *GrybiApoLp-III*

If ApoLp-III in hemolymph were necessary for the mobilization of lipids in the hemolymph and the maintenance of hemolymph lipid levels, the loss-of-function of ApoLp-III would be expected to change basal hemolymph lipid levels. To test this, we prepared crickets in which *GrybiApoLp-III* transcription was reduced by RNAi. To confirm the effect of RNAi, quantitative RT-PCR was performed using RNA extracted from the fat body of crickets 2 days after receiving *GrybiApoLp-III*-dsRNA or *EGFP*-dsRNA treatments (*Fig 3A*). Consequent *GrybiApoLp-III* expression was reduced after *GrybiApoLp-III*-dsRNA treatment, whereas it was not altered by *EGFP*-dsRNA treatment. Because ApoLp-III is an abundant protein in the hemolymph, we assessed whether hemolymph *GrybiApoLp-III* levels were also reduced by the knockdown of *GrybiApoLp-III*. Native PAGE analysis showed that hemolymph ApoLp-III levels gradually declined to undetectable levels by CBB-staining after *GrybiApoLp-III*-dsRNA injection, whereas these levels were not altered by *EGFP*-dsRNA injection (*Fig 3B*). While the transcriptional reduction by *GrybiApoLp-III*-dsRNA was confirmed from the 2nd day following treatment, the critical effect of *GrybiApoLp-III*-dsRNA on the level of *GrybiApoLp-III* in the hemolymph was observed from the 4th day following treatment.

### Effect of *GrybiApoLp-III* knockdown on basal hemolymph lipid levels

To elucidate whether *GrybiApoLp-III* mediates lipid transfer and affects the basal level of hemolymph lipids, we analyzed the effect of *GrybiApoLp-III* knockdown on hemolymph lipid levels by measuring DAG, a major neutral lipid in the hemolymph. We used crickets 6 days

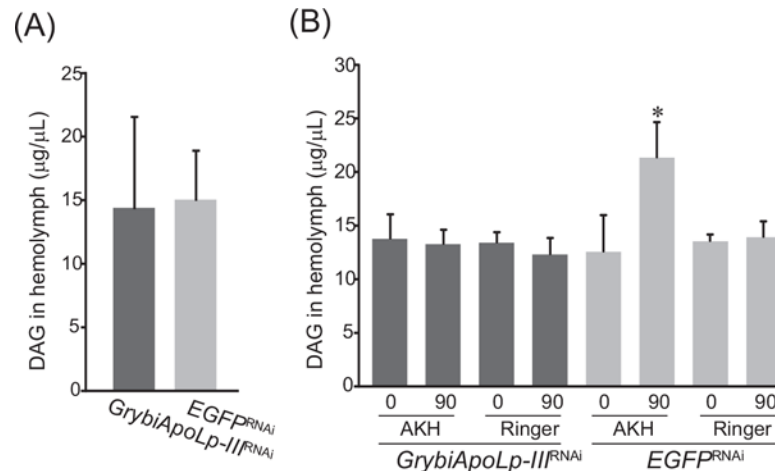

**Fig 4. Effect of *G. bimacutatus* ApoLp-III knockdown on hemolymph lipid levels.** (A) Analysis of basal hemolymph DAG levels in *GrybiApoLp-III<sup>RNAi</sup>* and *EGFP<sup>RNAi</sup>* crickets. Values are mean + SD (n = 5). (B) Analysis of basal hemolymph DAG levels in *GrybiApoLp-III<sup>RNAi</sup>* crickets and hemolymph DAG levels in *GrybiApoLp-III<sup>RNAi</sup>* crickets after GrybiAKH injection or Ringer's solution alone. Values are mean + SD (n = 5). Significant differences are denoted by an asterisk (\*,  $P < 0.05$  by Tukey's PSD test). Bars without asterisks indicate that differences among levels are not significant.

doi:10.1371/journal.pone.0154841.g004

after dsRNA treatment because of the significant reduction in free *GrybiApoLp-III* levels in the hemolymph (Fig 3B). In contrast to the reduced levels of free *GrybiApoLp-III* in the hemolymph, basal hemolymph lipid levels did not change in *GrybiApoLp-III<sup>RNAi</sup>* crickets 6 days after dsRNA treatment as compared to *EGFP<sup>RNAi</sup>* crickets (Fig 4A).

To confirm the effect of *GrybiApoLp-III* knockdown on AKH-triggered acute lipid mobilization, we injected a synthetic *GrybiAKH* peptide into *GrybiApoLp-III<sup>RNAi</sup>* crickets. This injection resulted in slight changes in the hemolymph lipid levels of *GrybiApoLp-III<sup>RNAi</sup>* crickets, whereas lipids were significantly mobilized by *GrybiAKH* injection in *EGFP<sup>RNAi</sup>* crickets (Fig 4B). Taken together, these results indicate that *GrybiApoLp-III* is not involved in lipid transfer to maintain basal lipid levels, but is necessary for AKH-triggered acute lipid mobilization.

### Effect of *GrybiApoLp-III* knockdown on food intake

To address whether the effects of *GrybiApoLp-III* knockdown influenced feeding behavior, we analyzed the approximate food intake by adult crickets treated with *GrybiApoLp-III*-dsRNA. We found no difference in the amount of food intake in both female and male *GrybiApoLp-III<sup>RNAi</sup>* crickets compared to *EGFP<sup>RNAi</sup>* crickets (Fig 5). These data demonstrate that lowered levels of *GrybiApoLp-III* in the hemolymph do not influence hemolymph lipid levels and food intake.

### Effect of *GrybiLp* injection on hemolymph lipid levels and feeding behavior

From analyses using *GrybiApoLp-III<sup>RNAi</sup>* crickets in which hemolymph lipid levels did not change, we cannot explain how the change in hemolymph lipid levels is linked with feeding behavior, as observed in a previous study using *GrybiAKHR<sup>RNAi</sup>* crickets [23]. In addition, we did not observe any difference in the amount of food intake by *GrybiApoLp-III<sup>RNAi</sup>* crickets. To manipulate hemolymph lipid levels, we attempted to inject DAG directly into the hemolymph;

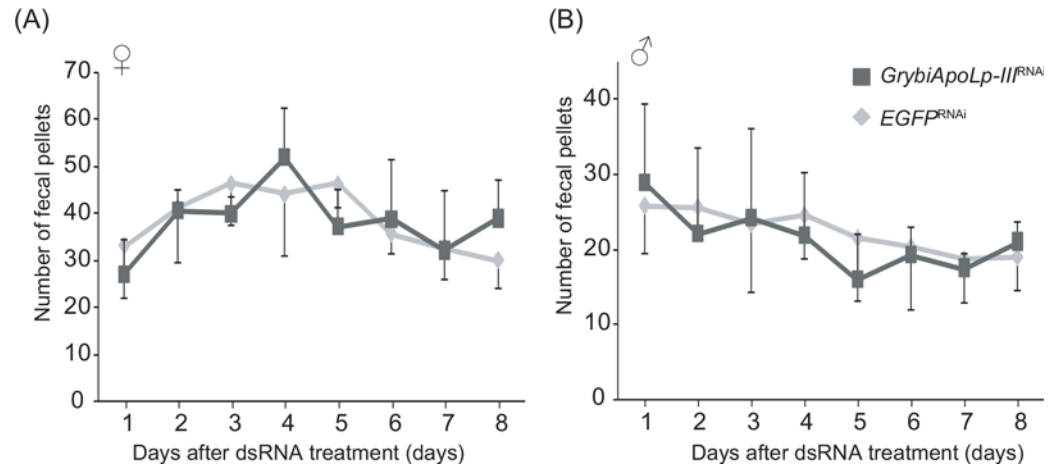

**Fig 5. Effect of *G. bimaculatus* ApoLp-III knockdown on food intake.** Food intake of *GrybiApoLp-III*<sup>RNAi</sup> adult females (A) and males (B). The amount of food intake was evaluated by counting the number of fecal pellets as previously observed [23]. There were no significant differences between dsGrybiApoLp-III-treated crickets and dsEGFP-treated crickets ( $P > 0.1$  by Tukey's PSD test). Values are mean  $\pm$  SD ( $n = 6$ ).

doi:10.1371/journal.pone.0154841.g005

however, we could not prepare crickets with increased hemolymph lipid levels (data not shown).

Therefore, we injected the lipid-containing Lp fraction, which was purified by ultracentrifugation (Fig 6A and 6B; the purified Lp was confirmed by SDS-PAGE), into the hemolymph to increase hemolymph lipid levels. Injection of Lp fractions containing 180, 270, and 450  $\mu$ g of lipid resulted in transient, dose-dependent increases in hemolymph lipid levels at 1 to 6 h after injection, whereas injection of the non-Lp-containing fraction had no effect on hemolymph lipid levels (Fig 6C).

Next, to investigate whether Lp injection, which caused increased hemolymph lipid levels, had an effect on feeding behavior, we measured the duration to the initiation of feeding behavior, which is an important index for evaluating feeding motivation in insects [28]. Injection of Lp fractions containing 90, 180, and 270  $\mu$ g of lipid prolonged the duration to the initiation of feeding in a dose-dependent manner, whereas injection of the non-Lp-containing fraction did not affect this duration (Fig 6D). This result shows that hemolymph lipid levels, when increased above basal levels, inhibit feeding initiation.

## Discussion

In this study, we identified GrybiApoLp-III as a member of the ApoLp-III family by amino acid sequence analysis and cDNA cloning. The similarity of the amino acid sequence between *G. bimaculatus* and *A. domesticus*, a closely related cricket species, was considerably high (97%). In contrast, the similarity was low (33%) between *G. bimaculatus* and a different Orthopteran species, *L. migratoria* (S1B Fig) [29]. In general, the similarity of ApoLp-IIIs among other insects is relatively low compared with other conserved proteins [30]. Despite their low similarity, most insect ApoLp-IIIs facilitate lipid mobilization, due to their common structural characteristics and conservation of the predominant expression site in the fat body among insects [20]. Regarding the involvement of GrybiApoLp-III in lipid mobilization, we confirmed that AKH injection and long-term starvation caused a decline in free GrybiApoLp-III levels (Fig 2). This finding indicates that GrybiApoLp-III is used for lipid mobilization and that it would be associated with HDLp to form LDLp for acute lipid mobilization.

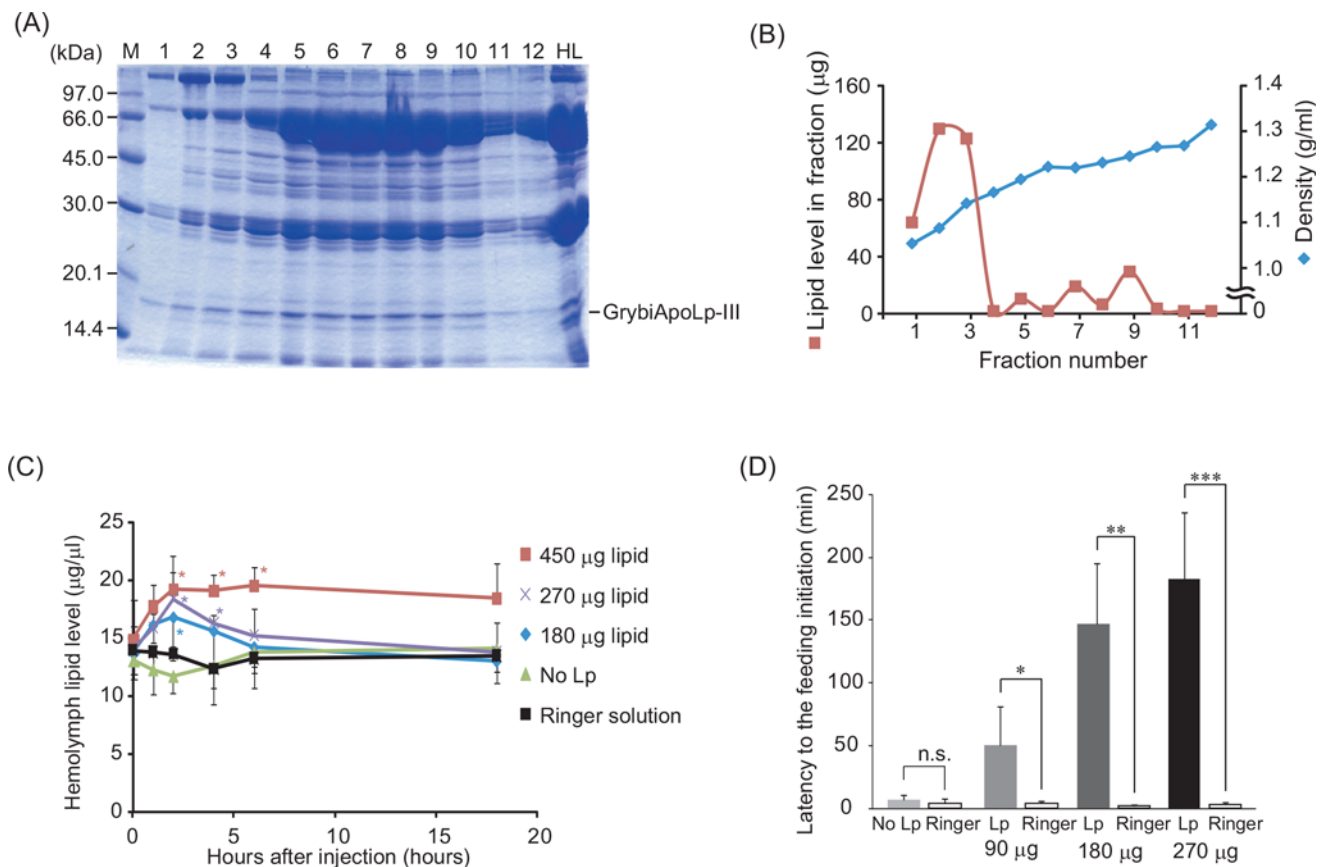

**Fig 6. Preparation of Lp and the effect of Lp injection on hemolymph lipid levels and the increased duration to initiate feeding.** (A, B) Preparation of GrybiLp. *G. bimaculatus* hemolymph was subjected to KBr density gradient ultracentrifugation. (A) After ultracentrifugation, 12 fractions were separated, and the hemolymph before ultracentrifugation was analyzed by SDS-PAGE. (B) Gradients were fractionated from low to high according to density, the specific gravity of each fraction was analyzed by SDS-PAGE. (C) Analysis of hemolymph lipid levels after injection of Lp fractions containing 180, 270, and 450 µg of lipid. Values are mean ± SD (n = 6). Significant differences compared to 0 h are denoted by asterisks (\*,  $P < 0.05$  by Dunnett's test). (D) Measurement of duration to the initiation of feeding after injection of Lp fractions containing 90, 180, and 270 µg of lipid. Values are mean + SD (n = 6). Significant differences are denoted by asterisks (\*,  $P < 0.05$ ; \*\*,  $P < 0.005$ ; \*\*\*,  $P < 0.0005$  for Mann-Whitney-test).

doi:10.1371/journal.pone.0154841.g006

Knockdown of GrybiApoLp-III could facilitate further analyses of the role of GrybiApoLp-III in the general lipid transfer mechanism, including maintenance of basal hemolymph lipid levels. Interestingly, we found that knockdown of GrybiApoLp-III did not change basal hemolymph lipid levels (Fig 4A). In addition, AKH injection into *GrybiApoLp-III<sup>RNAi</sup>* crickets had no effect on basal hemolymph lipid levels (Fig 4A). These results show that GrybiApoLp-III is not required by the hemolymph to maintain basal lipid levels during normal feeding (Fig 7A). Alternatively, our results could indicate that other presently unknown factors different from the ApoLp-III-utilizing pathway may be involved in the maintenance of basal hemolymph lipid titers. This result is content with the previous report by Candy et al [31], in which excessive starvation triggered an increase in hemolymph DAG levels but had no effect on AKH levels in the desert locust, *Schistocerca gregaria*. Therefore, the present study would seem to implicate an alternative pathway, which differs from the accepted paradigm for insect lipid mobilization [32]. In contrast, we observed lower levels of free Grybi-ApoLp-III in hemolymph of starved and AKH-stimulated crickets (Fig 2). Together with the data from GrybiApoLp-III knockdown crickets, these results indicate that free GrybiApoLp-III is important for lipid mobilization from the fat body into the hemolymph by forming LDLp under starved and activated AKH signaling conditions (Fig 7B and 7C).

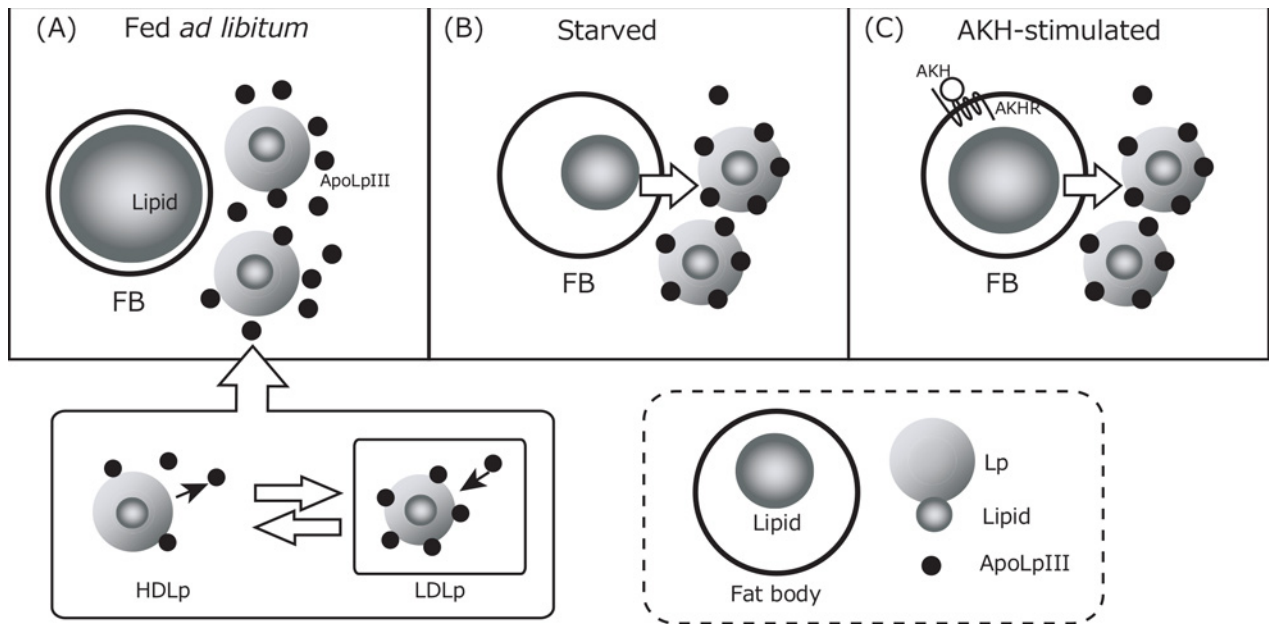

**Fig 7. Schematic models to maintain the hemolymph lipid level.** (A) For crickets feeding normally, the hemolymph lipid level is maintained by shuttling between HDLp to LDLp; however, the hemolymph lipid level was maintained at similar levels even in *GrybiApoLpIII* knockdown crickets. (B) For long-term starved crickets, the lowered hemolymph lipid level was recovered from the fat body lipids via LDLp. (C) For AKH-stimulated crickets, possibly under the condition of acute lipid requirements, hemolymph lipid levels increase by lipids of the fat body via LDLp by AKH stimulation.

doi:10.1371/journal.pone.0154841.g007

The injection of Lp into the hemolymph led to a transient increase in hemolymph lipid levels that lasted for several hours, while simultaneously decreasing feeding motivation (Fig 6C). We expected that these relatively high hemolymph lipid levels might cause some difference in feeding activity, because we previously demonstrated that lower hemolymph lipid levels, due to AKHR knockdown, resulted in increased food intake [23]. By contrast, we did not observe any changes in food intake even though crickets were treated with *GrybiApoLpIII* dsRNA (Fig 5), probably because *GrybiApoLpIII* dsRNA did not influence hemolymph lipid levels (Fig 4A); however, it is intriguing that hemolymph lipid levels were maintained even when crickets fed *ad libitum* did not have ApoLpIII. This implies that inactivation of the lipid-mobilizing capacity by ApoLpIII knockdown did not alter basal hemolymph lipid levels. In addition, the duration to initiate feeding after injection of Lp (Fig 6D) was significantly delayed, suggesting that the hemolymph lipid level is an important factor affecting feeding motivation.

In our previous study, we demonstrated that hemolymph lipid levels decreased and that feeding frequency increased in *GrybiAKHR<sup>RNAi</sup>* crickets [23]. This finding indicated that hemolymph lipid levels represent a causal factor for motivating feeding behavior in this species. Similarly, in this study, the injection of *GrybiLp*-containing lipids caused a significant delay to initiate feeding (Fig 6D). This result indicates that increases in hemolymph lipid levels cause a decrease in feeding motivation. Overall, these data strongly indicate that imbalanced hemolymph lipid levels modulate the motivation to feed.

The present study confirms the importance of basal hemolymph nutrient levels. Basal nutrient levels, which are regulated along with certain energy homeostasis pathways, might be archived through mechanisms balancing nutrient uptake and a trade-off between nutrient utilization and storage. Therefore, bias in these mechanisms resulting from imbalanced nutrient levels may alter physiological processes related to feeding behaviors. Based on the results of our study, we

conclude that hemolymph lipid levels play a key role in the regulation of feeding behavior by sensing internal nutrient status, which ultimately regulates the frequency of feeding in crickets.

## Supporting Information

**S1 Fig. cDNA cloning of *GrybiApoLp-III*.** (A) A partial cDNA sequence of *GrybiApoLp-III* and its deduced amino acid sequence. Primers used for first the PCR are shown as arrows. Stop codons are marked by an asterisk. Putative polyadenylation sites are underlined. (B) Alignment of *GrybiApoLp-III* and other *ApoLp-III*. The alignment of *ApoLp-III* amino acid sequences was generated using ClustalW and BOXSHADE. The *ApoLp-III* sequences used in this study are listed in the *Materials and Methods*. (C) Phylogenetic tree of *GrybiApoLp-III* and other *ApoLp-III*. The tree was generated by the neighbor-joining method using the amino acid sequences of *ApoLp-III*. *Homo sapiens* Apolipoprotein-AI was used as an outgroup. The bar represents 0.1 substitutions per site. Numbers represent bootstrap values (%). (PDF)

**S2 Fig. Effects of *GrybiApoLp-III* knockdown using a different control gene, *DsRed*, from the main text.** (A-C) Quantitative RT-PCR analysis of *GrybiApoLp-III* in *GrybiApoLp-III*-dsRNA-treated (*GrybiApoLp-III*RNAi) crickets. RNA was prepared from the fat body of crickets 2 days after dsRNA treatment. *DsRed*-dsRNA was used as an experimental control (*DsRed*RNAi). Values are mean+SD (n = 6). Significant differences are denoted by asterisks (\*\*,  $P < 0.01$ ; \*\*\*,  $P < 0.001$  for Student's *t*-test). (A) EF (elongation factor) was used as a reference of transcription. (B) *rp* (Ribosomal Protein S9) was used as a reference of transcription. (C) *βactin* was used as a reference of transcription. (D) Representative native-PAGE analyses of hemolymph collected from *GrybiApoLp-III*RNAi crickets. Hemolymph was collected 0, 2, 4, and 6 days after dsRNA treatment, and was subjected to native-PAGE. *DsRed*RNAi crickets were used as an experimental control. *GrybiApoLp-III* is indicated by a bar. Numbers represent individual crickets. This result was substantially similar to those in the main text, indicating the experimental reproducibility and no off-target effects by control dsRNAs. (E) Analysis of basal hemolymph DAG levels in *GrybiApoLp-III*RNAi and *DsRed*RNAi crickets. Values are mean + SD (n = 5). Data was statistically analyzed using Student's *t*-test. (F) Analysis of basal hemolymph DAG levels in *GrybiApoLp-III*RNAi crickets and hemolymph DAG levels in *GrybiApoLp-III*RNAi crickets after *GrybiAKH* injection or Ringer's solution alone. Values are mean + SD (n = 5). Significant differences are denoted by asterisks (\*\*\*,  $P < 0.001$  by Tukey's PSD test). Bars without asterisks indicate that differences among levels are not significant. (G)-(H) Approximate food intake of *GrybiApoLp-III*RNAi adult females (G) and males (H). The approximate amount of food intake was evaluated by counting the number of fecal pellets (23). There were no significant differences between *GrybiApoLp-III*-treated crickets and *DsRed*-treated crickets ( $P > 0.1$  by Tukey's PSD test). Values are mean ± SD (n = 6). Primers for qRT-PCR (*rp*) (ACCESSION No. DQ630939) For; 5'-TTTGCAGACCCAAGTGTTC-3' Rev; 5'-GCCTTTGGCGAATTAAGACA-3' Primers for qRT-PCR (*βactin*) (ACCESSION No. AB626808) For; 5'-TTGACAATGGATCCGGAATGT-3' Rev; 5'-AAAAGTCCCTGGGTGCA T-3' (EPS)

## Author Contributions

Conceived and designed the experiments: TK YT HN SN. Performed the experiments: TK YT SN. Analyzed the data: TK YT SN. Contributed reagents/materials/analysis tools: TK YT SN. Wrote the paper: TK YT HN SN.

## References

1. Bernays EA, Chapman RF (1973) The regulation of feeding in *Locusta migratoria*: Internal inhibitory mechanisms. *Entomol Exp Appl* 16:329–342
2. Simpson SJ (1981) An oscillation underlying feeding and a number of other behaviours in fifth-instar *Locusta migratoria* nymphs. *Physiol Entomol* 6:315–324
3. Simpson SJ, Ludlow AR (1986) Why locusts start to feed: A comparison of causal factors. *Anim Behav* 34:480–496
4. Simpson SJ (1995) The control of meals in chewing insects. In: Chapman RF, de Boer G., (Eds.), *Regulatory Mechanisms of Insect Feeding*, Chapman and Hall, New York, pp. 137–156
5. Simpson SJ (1983) The role of volumetric feedback from the hindgut in the regulation of meal size in fifth-instar *Locusta migratoria* nymphs. *Physiol Entomol* 8:451–467
6. Simpson SJ, Abisgold JD (1985) Compensation by locusts for changes in dietary nutrients: behavioural mechanisms. *Physiol Entomol* 10:443–452
7. Simpson SJ, Raubenheimer D (1993) The central role of the haemolymph in the regulation of nutrient intake in insects. *Physiol Entomol* 18:395–403
8. Simpson SJ (1982) Patterns in feeding: a behavioural analysis using *Locusta migratoria* nymphs. *Physiol Entomol* 7:325–336
9. Mullens DE (1985) Chemistry and physiology of the hemolymph. In *Comprehensive Insect Physiology, Biochemistry and Pharmacology*, vol. 3 (ed. Kerkut G. A. and Gilbert L. I.), pp. 356–399. London: Pergamon
10. Kilby BA (1963) The biochemistry of the insect fat body. *Arch Insect Physiol* 1:111–174
11. Storey KB, Bailey E (1978) The intracellular distribution of enzymes of carbohydrate degradation in the fat body of the adult male cockroach. *Insect Biochem* 8:73–79
12. Canavoso LE, Jouni ZE, Karnas KJ, Pennington JE, Wells MA (2001) Fat metabolism in insects. *Annu Rev Nutr* 21:23–46 PMID: [11375428](#)
13. Gäde G, Hoffmann KH, Spring JH (1997) Hormonal regulation in insects: facts, gaps, and future directions. *Physiol Rev* 77:963–1032 PMID: [9354810](#)
14. Gäde G (2009) Peptides of the adipokinetic hormone/red pigment-concentrating hormone family: a new take on biodiversity. *Ann N Y Acad Sci* 1163:125–136 doi: [10.1111/j.1749-6632.2008.03625.x](#) PMID: [19456334](#)
15. Stone JV, Mordue W, Batley KE, Morris HR (1976) Structure of locust adipokinetic hormone, a neuro-hormone that regulates lipid utilisation during flight. *Nature* 263:207–211 PMID: [958472](#)
16. Chino H. (1985) Lipid transport: biochemistry of hemolymph lipophorin. In *Comprehensive Insect Physiology, Biochemistry and Pharmacology*, vol. 10 (ed. Kerkut G. A. and Gilbert L. I.), pp. 115–135. Oxford: Pergamon Press
17. van der Horst DJ, Weers PM, van Marrewijk WJ (1993) Lipoproteins and lipid transport. In: *INSECT LIPIDS: CHEMISTRY, BIOCHEMISTRY AND BIOLOGY*. Stanley-Samuelsson D, and Nelson DR. Eds. University of Nebraska Press, London, pp. 1–24
18. Ryan RO, van der Horst DJ (2000) Lipid transport biochemistry and its role in energy production. *Annu Rev Entomol* 45:233–260 PMID: [10761577](#)
19. van der Horst DJ, van Hoof D, van Marrewijk WJ, Rodenburg KW (2002) Alternative lipid mobilization: the insect shuttle system. *Mol Cell Biochem* 239:113–119 PMID: [12479576](#)
20. Smith AF, Owen LM, Strobel LM, Chen H, Kanost MR, Hanneman E, Wells MA (1994) Exchangeable apolipoproteins of insects share a common structural motif. *J Lipid Res* 35:1976–1984 PMID: [7868976](#)
21. Isabel G, Martin JR, Chidami S, Veenstra JA, Rosay P (2005) AKH-producing neuroendocrine cell ablation decreases trehalose and induces behavioral changes in *Drosophila*. *Am J Physiol Regul Integr Comp Physiol* 288:R531–R538 PMID: [15374818](#)
22. Bharucha KN, Tarr P, Zipursky SL (2008) A glucagon-like endocrine pathway in *Drosophila* modulates both lipid and carbohydrate homeostasis. *J Exp Biol* 211:3103–3110 doi: [10.1242/jeb.016451](#) PMID: [18805809](#)
23. Konuma T, Morooka N, Nagasawa H, Nagata S (2012) Knockdown of the adipokinetic hormone receptor increases feeding frequency in the two-spotted cricket *Gryllus bimaculatus*. *Endocrinology* 153:3111–3122 doi: [10.1210/en.2011-1533](#) PMID: [22619358](#)
24. Lorenz MW (2003) Adipokinetic hormone inhibits the formation of energy stores and egg production in the cricket *Gryllus bimaculatus*. *Comp Biochem Physiol B Biochem Mol Biol* 136:197–206 PMID: [14529746](#)

25. Zöllner N, Kirsch K (1962) The quantitative determination of lipids (micromethod) by means of the sulphospho-vanillin reaction common to many natural lipids (all plasma lipids). *Z ges exp Med* 135:545–561
26. Tsuchida K, Yokoyama T, Sakudoh T, Katagiri C, Tsurumaru S, Takada N, Fujimoto H, Ziegler R, Iwano H, Hamano K, Yaginuma T (2010) Apolipoprotein-III expression and low density lipoprotein formation during embryonic development of the silkworm, *Bombyx mori*. *Comp Biochem Physiol B Biochem Mol Biol* 155:363–370 doi: [10.1016/j.cbpb.2009.12.006](https://doi.org/10.1016/j.cbpb.2009.12.006) PMID: [20079870](https://pubmed.ncbi.nlm.nih.gov/20079870/)
27. Sundermeyer K, Hendricks JK, Prasad SV, Wells MA (1996) The precursor protein of the structural apolipoproteins of lipoprotein: cDNA and deduced amino acid sequence. *Insect Biochem Mol Biol* 26:735–738 PMID: [9014323](https://pubmed.ncbi.nlm.nih.gov/9014323/)
28. Nagata S, Morooka N, Matsumoto S, Kawai T, Nagasawa H (2011) Effects of neuropeptides on feeding initiation in larvae of the silkworm, *Bombyx mori*. *Gen Comp Endocrinol* 172:90–95 doi: [10.1016/j.ygcen.2011.03.004](https://doi.org/10.1016/j.ygcen.2011.03.004) PMID: [21397600](https://pubmed.ncbi.nlm.nih.gov/21397600/)
29. Mullen L, Goldsworthy G (2003) Changes in lipoproteins are related to the activation of phenoloxidase in the haemolymph of *Locusta migratoria* in response to injection of immunogens. *Insect Biochem Mol Biol* 33:661–670 PMID: [12826093](https://pubmed.ncbi.nlm.nih.gov/12826093/)
30. Kanost MR, Boguski MS, Freeman M, Gordon JI, Wyatt GR, Wells MA (1988) Primary structure of apolipoprotein-III from the migratory locust, *Locusta migratoria*. Potential amphipathic structures and molecular evolution of an insect apolipoprotein. *J Biol Chem* 263:10568–10573 PMID: [3392027](https://pubmed.ncbi.nlm.nih.gov/3392027/)
31. Candy DJ (2002) Adipokinetic hormone concentrations in the haemolymph of *Schistocerca gregaria* measured by radioimmunoassay. *Insect Biochem Mol Biol* 32:1361–1367 PMID: [12530204](https://pubmed.ncbi.nlm.nih.gov/12530204/)
32. van der Horst DJ, Rodenburg KW (1988) Locust flight activity as a model for hormonal regulation of lipid mobilization and transport. *J Insect Physiol* 56:844–853
